# Supplementary material
Source: PubMed Central journal article supplement (PMC7225022)
Supplement: LSHSS-51-184-s001.pdf [file LSHSS-51-184-s001.pdf]

**Supplemental Material S1.** PS conversation sample in CHAT format.

@Begin

@Languages: eng

@Participants: CHI Target\_Child, INV Investigator

@ID: eng|change\_me\_later|CHI||||Target\_Child||

@ID: eng|change\_me\_later|INV||||Investigator||

@Comment: Language = English

@Time Start: 0:00

@Comment: ADOS 1000001, C=child, E=examiner, Module # R29-16,

Transcriber: MO, 11/20/14 +<00:00:00>

\*INV: just leave it .

\*INV: leave it on though .

\*INV: okay .

\*INV: this is r twenty nine sixteen .

\*INV: and this is the conversational language sample .

\*CHI: that xxx .

\*INV: okay .

\*INV: <you ready parker> [>] ?

\*CHI: <boo boo\_boo> [<] .

\*CHI: yeah .

\*INV: alright so we have been so <busy working that I haven't> [>] xxx

+/.

\*CHI: <are working I <&+ha> [/?] haven't> [<] xxx +/.

\*INV: oh .

\*INV: just let me talk .

\*INV: I haven't had the chance to learn much about you .

\*INV: so I would like us to sit and talk so I can know you a little bit

better .

\*INV: I was talking to your mom and then you also told me that you were

gonna be peter pan for halloween .

\*INV: that sounds really cool .

\*INV: can you tell me about that ?

\*INV: tell me about being peter pan .

\*CHI: him [: he's] all green .

\*CHI: and I xxx hat .

\*INV: yeah ?

\*INV: what else ?

\*CHI: another bow .

\*INV: mhm .

\*CHI: that's it .

\*INV: and that's it ?

\*INV: yeah ?

\*INV: what is everybody else in your family gonna be ?

\*CHI: she's gonna be xxx +.

\*CHI: <Jake have [: has] &+s> [/?] Jake have [: has] a sword .

@Comment: <00:00:59>

\*INV: mhm .

\*CHI: <and> [/?] and I xxx .

\*CHI: oh xxx .

\*CHI: this is the final about xxx .

\*INV: and what ?

\*CHI: I said this is the <&+b> [/?] xxx +...

\*CHI: that's enough about xxx +...

\*CHI: see I don't know .

\*INV: oh okay .

\*INV: but it sounds like a lot of fun .

\*INV: are you gonna go trick or treating in your neighborhood ?

\*CHI: no .

\*INV: no ?

\*INV: do you go trick or treating or do you go to a party ?

\*CHI: Trick\_or\_treating .

\*INV: are you gonna get lots of candy ?

\*CHI: <one time> [<] we got to <a thousand &-uh> [/?] one million with  
candy .

\*INV: <a million> [>] ?

\*CHI: <<and it> [/?]> [<] and we had <to> [/?] to all my sofa [^ eu] .

\*INV: wow .

\*CHI: and <my candy was full of> [/?] my house was full of candy .

\*INV: oh man .

\*INV: it sounds like a lot of candy .

\*INV: were there m\_and\_ms there ?

\*CHI: one bag .

\*INV: only one bag of m\_and\_ms ?

@Comment: <00:02:00>

\*CHI: <that it> [/?] it was in the bottom .

\*INV: all the way in the bottom .

\*INV: hm .

\*CHI: no one could find it .

\*INV: no one could find it ?

\*INV: oh .

\*INV: I would have found it .

\*CHI: we can sell them .

\*INV: you were gonna sell all the candy that you had ?

\*CHI: no .

\*INV: do you have any pets ?

\*CHI: <three> [/?] four .

\*INV: four pets ?

\*CHI: xxx .

\*CHI: so my turtle <xxx> [>] three newt [: newts] .

\*CHI: <we &-m> [/?] it underground .

\*INV: okay .

\*CHI: and <I &-um> [/?] a guinea pig stooey <xxx> [>] and a dog scout .

@Comment: <00:03:02>

\*INV: your dog scout .

\*CHI: how many pets is that ?

\*INV: three .

\*INV: I think you said three .

\*CHI: no .

\*INV: you said four ?

\*CHI: yeah .

\*CHI: four .

\*CHI: okay .

\*INV: <the turtle> [<], <xxx> [>] dog xxx +/.

\*CHI: <turtle> [<] .

\*CHI: no .

\*CHI: no .

\*CHI: turtle, newt <xxx> [>], guinea pig .

\*INV: <oh> [<] .

\*INV: oh .

\*CHI: and dog .

\*INV: wow .

\*INV: which one's your favorite ?

\*CHI: &-hm all of them .

\*INV: all of them ?

\*CHI: (ex)cept [/?] (ex)cept the newt .

\*INV: except for the newt .

\*INV: what's the newt's name ?

\*CHI: so I haven't think [: thought] about it yet .

\*INV: oh .

\*CHI: we've [: we] lost the newt .

\*INV: so it doesn't have a name ?

\*CHI: no .

\*INV: hm .

\*INV: okay .

\*INV: well we should probably talk about some other things, right ?

\*CHI: right .

\*INV: what grade are you in ?

\*CHI: kindergarten .

\*INV: okay .

\*INV: it's been a long time since I was in school .

\*INV: so I really don't remember very much about kindergarten .

\*INV: tell me what you did in school yesterday or on friday .

\*INV: you didn't have school on friday, did you ?

@Comment: <00:04:00>

\*CHI: we got four days off .

\*INV: four days off ?

\*CHI: kinda like three days off .

\*INV: mhm .

\*CHI: and xxx +/-.

\*INV: so the last day you were in school, can you tell me about it ?

\*INV: tell me everything you remember .

\*CHI: <like> [/?] before <the> [/?] the four days off ?

\*INV: mhm .

\*INV: before you had the four days off what did you do ?

\*CHI: we got to put all of us [: our] draws [: drawings] into a ten  
pocket .

\*CHI: and we got three in the tens pocket .

\*INV: really ?

\*INV: how ?

\*INV: <that's cool> [>] ?

@Comment: <00:05:04>

\*INV: what's your favorite part about kindergarten ?

\*CHI: going to a gym .

\*INV: oh tell me all about that .

\*CHI: <with we don't> [/?] we go with Mr\_a to it .

\*CHI: I know Mr\_a from tennis team .

\*INV: mhm .

\*CHI: and Mr\_a a boy .

\*INV: okay .

\*INV: is there anything you don't like about kindergarten ?

\*CHI: no .

\*INV: no ?

\*INV: you like everything ?

\*CHI: yeah .

\*INV: hm cool .

\*INV: what's your teacher's name ?

\*CHI: Ms\_t .

\*INV: hm .

@Comment: <00:05:58>

\*INV: <no> [>] xxx +/.

\*CHI: <we saw> [<] xxx +/.

\*INV: oh no .

\*INV: we're gonna keep recording .

\*INV: can you see the numbers ?

\*INV: oh please don't do that .

\*INV: can you see the numbers <on there> [>] ?

\*CHI: <yeah> [<] .

\*INV: we're gonna record until we get to fifteen or twenty .

\*INV: until that number says fifteen or twenty .

\*CHI: <how> [/?] what is [: does] twenty mean ?

\*INV: twenty xxx +...

\*INV: that means minutes <that we are> [>] talking .

\*CHI: <how> [<] xxx +/.

\*INV: so you've already done six .

\*CHI: minutes ?

\*INV: mhm .

\*INV: okay .

\*CHI: <okay> [>] .

\*INV: <remember> [<] we were talking about kindergarten ?

\*INV: and we're <talking> [>] about your teacher ?

\*CHI: <yeah> [<] .

\*INV: tell me some things that you do with your teacher .

\*CHI: learn .

\*INV: mhm .

\*CHI: go to the Stem\_lab .

\*INV: mhm .

\*CHI: learn about <at Stem\_lab &-uh> [/?] nonliving .

\*INV: <mhm> [<] .

\*CHI: and Ms\_t know [: knows] my grandma .

\*INV: really ?

\*INV: how does she know your grandma ?

@Comment: <00:06:59>

\*CHI: because grandma retired &-um teaching kindergarten .

\*INV: <oh> [>] .

\*CHI: <and> [<] Ms\_t was &-um grandma [: grandma's] friend .

\*INV: oh cool .

\*INV: that's pretty cool .

\*INV: hm .

\*INV: tell me what your teacher looks like .

\*INV: have you ever had a teacher that you didn't like ?

\*CHI: no .

\*INV: okay .

\*CHI: yeah .

\*CHI: those subs before .

\*INV: you haven't had subs yet ?

\*INV: maybe someday your teacher will be absent and then you'll have a  
sub .

\*CHI: I don't like subs .

\*INV: no ?

\*INV: okay .

\*INV: what did you do after school &-um the last day you were there ?

\*CHI: <&-hm> [>] .

\*INV: <last week> [<] .

\*INV: what did you do after school ?

\*CHI: probably xxx to go to T\_lake .

@Comment: <00:08:04>

\*INV: okay .

\*INV: tell me everything about that .

\*CHI: we xxx and had a long long way <to the> [/?] to T\_lake .

\*INV: mhm .

\*CHI: grandma was there .

\*INV: mhm .

\*CHI: we stayed three days .

\*CHI: that means like three whole days and one half day .

\*INV: okay .

\*INV: what do you do when you're at M\_lake ?

\*CHI: T\_lake ?

\*INV: mhm .



\*CHI: &-um we ride a boat .

\*INV: mhm .

\*CHI: we bring a dog up .

\*CHI: and guess what kind of birdies are ?

\*INV: what ?

\*CHI: and they even for cha\_cha\_cha@c [ ^ eu ] .

\*INV: that's what they sound like ?

\*CHI: no .

\*CHI: that [ : that's ] they start .

\*CHI: cha@c cha@c .

\*CHI: that [ : that's ] what a first word is .

\*INV: oh .

\*CHI: cha@c cha\_cha@c .

\*INV: hm .

\*INV: cool .

\*CHI: <&+t> [ / ? ] try it .

\*CHI: try to say it .

\*INV: I don't know .

\*CHI: cha@c cha\_cha@c .

\*INV: I can't .

\*CHI: try !

\*INV: cha@c <cha\_cha@c> [ > ] .

\*CHI: <cha@c cha@c> [ < ] .

@Comment: <00:09:00>

\*CHI: cha@c <xxx> [ > ] chuck@c .

\*INV: <I don't know> [ < ] .

\*INV: <chuck> [ > ] ?

\*CHI: <uh@c> [ < ] uh@c checkers .

\*CHI: checkers .

\*INV: checkers ?

\*CHI: yeah .

\*INV: huh .

\*INV: those are the birds you saw <or the> [>] birds you hunt ?

\*CHI: <yeah> [<] .

\*CHI: and our birds xxx +...

@Comment: <00:10:04>

\*INV: let's talk about something else .

\*INV: we already talked about your pets .

\*INV: what sports do you like to play, P ?

\*CHI: tennis, T\_ball, baseball .

\*INV: what's your favorite ?

\*CHI: tennis .

\*INV: mhm .

\*CHI: and T\_ball .

\*INV: tell me how you play tennis .

\*CHI: you have to have a tennis racket, <xxx> [<] tennis ball, <xxx> [<]  
two players <xxx> [<] or more .

\*INV: <mhm> [>] .

\*INV: <mhm> [>] .

\*INV: <mhm> [>] .

\*CHI: and T\_ball we need a bat, <xxx> [<] a tee, <xxx> [>] a baseball .

\*INV: <mhm> [<] .

\*INV: <mhm> [>] .

\*INV: mhm .

\*CHI: a jersey <xxx> [>] for teams .

\*INV: <mhm> [<] .

\*INV: mhm .

\*CHI: and that are [: is] three things .

@Comment: <00:10:59>

\*CHI: baseball, <xxx> [<] tee, <xxx> [<] and <&+ba bat> [/?] bat .

\*INV: <mhm> [>] .

\*INV: <mhm> [>] .

\*INV: cool .

\*CHI: and glove .

\*INV: <and love> [<] ?

\*INV: you need love ?

\*CHI: no .

\*INV: <a glove> [<] .

\*CHI: yes .

\*INV: oh a glove .

\*CHI: like a catching glove .

\*INV: mhm .

\*INV: a catching glove .

\*INV: cool .

\*INV: what other sports do you like besides tennis and T\_ball ?

\*CHI: soccer .

\*INV: mhm .

\*CHI: you just need <&+do> [/?] two goals <xxx> [>] and a soccer ball .

\*CHI: pretty easy .

\*INV: are there any sports that you don't like to play ?

\*CHI: dodgeball .

\*INV: yeah ?

\*CHI: that's another game .

\*CHI: that's a made up game .

\*INV: mhm .

\*CHI: and <&+kee &-um> [/?] Keep\_away .

\*INV: hm .

\*CHI: I like playing that .

\*INV: mhm .

\*CHI: not dodgeball .

\*CHI: but think fast .

\*CHI: they <like> [/?] throw a ball at somebody .

\*INV: mhm .

@Comment: <00:12:00>

\*CHI: I kinda do like dodgeball .

\*INV: mhm .

\*CHI: <I'm &+th> [/?] I'm thinking about something that xxx <not> [/?] not  
zero gravity .

\*CHI: they can <&+tr> [/?] make a lot a lot of trampolines  
[^ eu] .

\*INV: mhm .

\*CHI: and I can't know if it xxx +...

\*CHI: I don't know <xxx> [>] if it [: it's] like dodgeball or  
something else .

\*INV: <mhm> [<] .

\*INV: hm .

\*CHI: I don't know if it's something else .

@Comment: <00:13:02>

\*INV: let's talk about one more thing .

\*INV: once, when I was about your age, I went on a vacation to Florida  
with my family .

\*CHI: hey I go there .

\*INV: really ?

\*INV: that sounds fun .

\*INV: tell <me about it> [>] .

\*CHI: <and that's what> [<] xxx +/-.

\*CHI: we swim at night .

\*INV: what's that ?

\*CHI: we swim at night .

\*INV: really ?

@Comment: <00:14:02>

\*INV: <were you> [>] scared ?

\*CHI: <<in> [/?] in> [<] &-um at a pool .

\*CHI: &-um my grandma owns a condo .

\*INV: mhm .

\*CHI: and we sleep there kinda .

\*INV: mhm .

\*CHI: and then one of my aunt [: aunts] own [: owns] a condo .

\*INV: mhm .

\*CHI: and <we> [/?] we have a sleepover there .

\*INV: <cool> [>] .

\*CHI: <and> [<] &-um xxx +/.

\*INV: tell me the most fun thing about going on vacation .

\*CHI: <&+s at Florida &-um we me and grandma kind of like some of &+w &-um  
like> [/?] my aunt <&+th &-um> [/?] Claudia and grandma goes [: go]  
outside at night .

\*CHI: and we can swim .

\*CHI: <that's> [/?] this the best thing .

\*CHI: <that's> [/?] <xxx> [<] <that's> [<] xxx +/.

\*INV: <yeah> [>] .

\*INV: <cool> [>] .

\*INV: that's cool .

\*CHI: that's the thing .

\*CHI: that [: that's] the best thing there at night .

\*CHI: that's what is the best thing .

\*CHI: what is the best thing ?

\*CHI: and no sun out .

\*INV: mhm .

\*CHI: what we don't have wear [^ eu] ?

\*CHI: what we don't have wear [^ eu] ?

\*INV: I don't know .

@Comment: <00:15:03>

\*CHI: what we don't have to wear ?

\*INV: you don't have to wear swimsuits ?

\*CHI: <we &+ha> [/?] we have to wear swimsuits .

\*INV: you don't have to wear sunscreen ?

\*CHI: yes .

\*INV: <oh> [>] .

\*CHI: <that's the thing> [<] .

\*CHI: it's not sunny out, right ?

\*INV: right .

\*INV: there's no sun .

\*INV: hm <that's cool> [>] .

\*CHI: <then we won't> [<] get burnt .

\*INV: and you don't get burnt .

\*INV: okay .

\*INV: now you <can press> [>] xxx +/-.

\*CHI: <and there's> [<] a five and a one .

\*INV: yep .

\*INV: it is a five and a one .

\*INV: you can press stop .

@Comment: <00:15:25>

@End
