# Supplementary material
Source: PubMed Central journal article supplement (PMC7225022)
Supplement: LSHSS-51-184-s002.pdf [file LSHSS-51-184-s002.pdf]

## **Supplemental Material S2.** SH conversation sample in SALT format.

\$ Child, Exami

+ CONTEXT: Conversation

+ [EO]: Overgeneralization error (word level)

+ [EP]: Pronoun error (word level)

+ [EW]: Error at the word level

+ [EU]: Error at the utterance level

+ [P] : Prompt that does not interfere with discourse

- 0:00

E TELL ME EVERYTHING YOU DID IN SCHOOL YESTERDAY.

E OR TODAY, ACTUALLY.

C YEAH, TODAY.

C (UM) WELL TODAY, WE HAVE THE WHITE DAY.

C WHITE DAY IS WHEN YOU DO DIFFERENT THING/S.

C A RED DAY IS YOU DO DIFFERENT THING/S TOO.

C SO TODAY WAS A WHITE DAY.

C (UM) I WENT OUT ON A SHOP SEVENTH HOUR.

E REALLY, TO A SHOP?

C YEAH.

E WOW.

E TELL ME ABOUT THAT.

C WELL (: ) IN SEVENTH HOUR, ME AND MISS GOLD WENT SHOP/ING.

E YOU WENT SHOP/ING?

E WHAT STORE DID YOU GO TO?

C WOODMANS.

E WOODMANS.

E WHAT DID YOU BUY?

C I BUY[EW:BOUGHT] GOODY/S.

E GOODY/S.

E WHAT WERE THE GOODY/S FOR?

- 1:00

C FOR MY GRANDMA.

C SHE WAS SICK.

E SHE WAS SICK.

C YEAH.

E TELL ME ABOUT (UM) THE GOODY/S THAT YOU BOUGHT.

C WELL, IT/'S COOKIE/S, RAISIN/S, NUT/S, CASHEW/S, AND COLESLAW AND NOODLE/S, BREAD AND MILK AND EGG/S FOR HER.

E I SEE.

E (UM) AND THEN DID YOU TAKE THEM TO HER HOUSE AFTERWARD?

C YEAH.

E TELL ME WHAT ELSE YOU DO IN SCHOOL.

C I DO MATH.

E MATH.

C YEAH.

- 2:00

E IS THAT YOUR FAVORITE SUBJECT?

C YEAH.

E TELL ME WHAT YOU LIKE ABOUT MATH.

C WELL MISS B, MY TEACHER (: H\*) HAND SOME WORKSHEET/S TO ME.

C THEY HAVE SOME SUBTRACTION PROBLEM/S FOR ME TO DO.

E MHM.

C SO I DID THAT.

E AND THEY/'RE FUN?

C YEAH.

E YEAH.

E IS THERE ANYTHING ELSE THAT YOU DO IN SCHOOL THAT/'S INTERESTING?

C I DO SCIENCE.

C WE PLAY JEOPARDY.

E SCIENCE?

E TELL ME ABOUT THAT.

C WE PLAY JEOPARDY.

E YOU WHAT?

C WE PLAY JEOPARDY.

E YOU PLAY JEOPARDY.

C YEAH.

E OH.

C I WAS A STAR.

E YOU WERE THE STAR?

C YEAH.

E TELL ME MORE ABOUT THAT.

C WELL (: ) MRS SMITH, MY AID, SAID "HMM, (I) I NEVER HEARD OF THIS RULE BEFORE".

- 3:14

C "HMM, THIS IS SOMETHING NEW".

C "HMM, WELL (W\*) WHAT WAS THE ANSWER"?

C AND THEN I SAID "XX".

C SHE WAS AMAZED.

E SHE WAS AMAZED?

C YEAH.

E BECAUSE YOU KNEW THE ANSWER?

C YEAH.

E WOW.

E WOW.

E HOW LONG DID YOU PLAY JEOPARDY?

C FOR ABOUT FIFTEEN MINUTE/S.

E I SEE.

E IS THERE ANYTHING THAT YOU DON'T LIKE ABOUT SCHOOL?

C WELL, LET/'S SEE.

C SOMETIMES, I GET[EW:AM] TARDY.

C AND \*I DON'T KNOW WHERE THE PLACE/S I/'VE BEEN.

- 4:01

C LIKE I GOT CONFUSED ABOUT RED AND WHITE DAY/S.

C LIKE RED CHOIR, MATH WHITE.

C AND MRS XX SAY/\*3S "NO, CHOIR WHITE, MATH RED.

E OH, SO ON RED DAY/S, YOU GO TO CHOIR.

E AND ON WHITE DAY/S, YOU HAVE MATH.

E IS THAT RIGHT?

; 00:05

E OR TELL ME WHAT YOU DO ON RED DAY/S AGAIN.

C RED DAY/S, I HAVE MATH FIRST HOUR.

E OH, OKAY.

C WHITE DAY/S, I GOT[EW:HAVE] CHOIR FIRST HOUR.

E OH, I SEE.

E OKAY.

E TELL ME ABOUT CHOIR.

C CHOIR, WE EVEN GOT A NEW CHOIR TEACHER NAMED MR TOM.

E MHM.

C HE IS A NICE GUY.

C HE IS TELL/ING THE PEOPLE WHAT TO DO.

- 5:00

C LIKE, ALTO/S SING WHEREVER YOU GO.

C XX.

C THEN THEY ALL SING.

C RIGHT, WHEREVER YOU GO.

E I SEE.

E THAT/'S PRETTY NEAT.

E THAT MUST BE A LOT OF FUN.

C I KNOW.

E (UM) WHAT/'S YOUR TEACHER/Z NAME?

C MR SAM AND MISS MARY.

E OH, SO YOU HAVE TWO TEACHER/S?

C YEP.

E WOW.

E (WHICH ONE IS) DO YOU HAVE A FAVORITE TEACHER?

C YEAH, I DO.

C MR SAM.

E TELL ME ABOUT HER.

C IT IS A HIM.

E OH, IT/'S A HIM?

E OH, EXCUSE ME.

E TELL ME ABOUT HIM.

C ALRIGHT.

C (UM) HE IS A POPULAR GUY.

C HE/'S FROM MINNEAPOLIS.

C UNIVERSITYOFMINNESOTA.

- 6:00

C HE GO/3S TO SCHOOL THERE.

E MHM.

C AND (UH : HE/'S) HE/'S LIKE HAPPY AS A TEACHER.

E TELL M\*>

E OH, GO AHEAD.

C ALRIGHT.

C SO, HE CAME IN THIS ROOM AND SAID "I/'M A NEW TEACHER EVERYONE".

E OH, HE DID?

C YEAH.

E AND HE/'S VERY POPULAR?

C YEAH.

E TELL ME WHAT HE TEACH/3S YOU.

E WHAT SORTS OF THING/S DOES HE DO IN CLASS?

C LIKE, HE TEACH/3S ME THE NOTE/S LIKE THREE XX FOUR.

C OR {C DEMONSTRATES BY CLAPPING} THAT.

E WOW.

E WOW.

- 7:00

E (UM) WHAT OTHER TEACHER/S HAVE YOU HAD?

E OR TELL ME ABOUT SOME OF YOUR OTHER TEACHER/S.

C ALRIGHT.

C THERE ARE[EW:IS] MRS LARK.

C THAT/'S JOHN/Z AID.

C HER I GOT [EU].

C (UH :) MR ROPER, MY SWIM TEACHER.

C THEN THERE/'S (UH) MRS STERLING, MATT/Z AID.

C MISS TAMMY/'S GONE SO SHE HAS A REPLACE[EW:REPLACEMENT] FOR HER.

E OH.

C SHE RETIRE/ED.

E SHE RETIRE/ED?

C MHM.

C SO DID MR DAVE.

E HE DID?

C YEAH.

C (UM THEN I HAVE) LET/'S SEE, THEN I HAD A NEW PT TEACHER NAMED MRS HAMMOND.

- 8:00

C H A M M O N D {C SPELLS IT OUT}.

E OH I SEE, HAMMOND.

C YEAH.

C THEN I HAVE A[EW:AN] OT TEACHER, MRS JENNY.

E MRS JENNY?

C YEAH.

C (HE) SHE IS FROM KANSAS.

E KANSAS?

C <YEAH>.

E <WOW>.

C NOT FAR FROM LAWRENCE.

E OH, I SEE.

E SHE/'S FROM FAR AWAY THEN.

C MHM.

E WOW.

E WOW.

E IS THERE ANYTHING ELSE YOU/'D LIKE TO TELL ME ABOUT SCHOOL?

C WELL, YEAH I DO.

E OK.

C (UM I UM :) OH YEAH (UM) LET/'S SEE, I HAVE LUNCH.

E OH, YOU HAVE LUNCH?

C YEAH.

E OH.

C LET/'S SEE, (I I) OH YEAH, I HAVE STROMBOLI, IF YOU DON'T KNOW.

- 9:03

E STROMBOLI?

C YEAH.

E FOR LUNCH?

C YEAH.

C YOU DON'T KNOW WHAT STROMBOLI IS^

E I <DO>.

C <IT/'S> GOT^

E OH.

C IT/'S GOT (UH) CHEESE AND HAM AND \*A BISCUIT ON IT.

E OH, WOW.

E THAT SOUND/3S GOOD.

E DID YOU BRING THAT FROM HOME OR (DID) DID YOU <BUY IT AT SCHOOL>?

C <THEY MAKE IT FOR SCHOOL>.

E OH.

E STOMBOLI/S HUH?

E WHAT ELSE DID YOU HAVE WITH THAT STROMBOLI?

C WELL I HAD (UH :) GREEN BEAN/S.

C (M\*) MY DAD SAID "IF YOU EAT GREEN BEAN/S, IT/'S HEALTHY FOOD FOR ME[EW:YOU]".

C AND SOME ORANGE/S AND MILK.

C I HAD COOKIE/S THERE TODAY.

E COOKIE/S TOO?

C YEAH.

E WOW.

E THAT SOUND/3S LIKE A GREAT LUNCH.

= C LAUGHS.

E THAT SOUND/3S LIKE A GREAT LUNCH.

C I KNOW.

- 10:00
