# Supplementary material
Source: PubMed Central journal article supplement (PMC7225022)
Supplement: LSHSS-51-184-s003.pdf [file LSHSS-51-184-s003.pdf]

**Supplemental Material S3.** SH narrative sample in SALT format.

\$ Child, Exami

+ ID: SYN48n

- 0:00

E HOW DOES THE STORY START?

C ALLRIGHT {C LAUGHS}.

C THIS BOY IS LOOK/ING AT THE MIRROR.

C HE DRESS/ED UP.

C AND SO DID THE DOG AND THE TURTLE AND THE FROG.

C WATCH IN THE MIRROR TOO.

: 00:05

E GOOD.

E HERE/'S THE NEXT PAGE.

C THE BOY NAME/ED STEVE PAT/3S THE DOG.

C AND THE FROG LEAP/3S TO HIS COAT.

C THEN STEVE WAVE/3S \*TO THE DOG AND THE TURTLE GOODBYE.

C "SEE YOU LATER" SAID THE DOG.

C "SEE YOU LATER" SAY/3S STEVE.

- 1:00

E NEXT PAGE.

C EARLIER, THEY WENT TO A (:) FANCY RESTAURANT.

C STEVE AND MICHELLE LOOK AT THE MENU SIGN.

C THEN, THE MAN, EVERETT, LOOK/3S AT THE MINISTER BESIDE HIM.

: 00:11

E NEXT PAGE.

- 2:00

C THEY ARE READ/ING THE MENU/S TO SEE WHAT THEY \*WILL ORDER.

C STEVE ORDER/\*3S HAMBURGER/S, FRENCHFRIES, AND A SPRITE.

C THE FROG CAME.

C AND THEY SAW THE GUY/S PLAY/ING INSTRUMENT/S.

: 00:09

E NEXT PAGE.

C (THE FROG) THE FROG WENT IN THE SAXOPHONE.

C THE MAN CAN/'T BREATHE.

C BECAUSE THERE WAS A FROG IN THERE.

- 3:00

C THE MAN LOOK/\*3S INSIDE THE SAXOPHONE.

C AND SAID "WHO/'S IN THERE"?

: 00:08

E NEXT PAGE.

C THE FROG WENT (ON THE :) ON TOP OF DANIEL/Z HEAD.

C DANIEL FAINT/ED.

C AND THE SAXOPHONE (: ) WENT FLY/ING EVERYWHERE INTO THE RESTAURANT.

C HEY (: ) WHO DID THIS?

C GET THAT FROG OUT OF HERE.

: 00:05

- 4:01

E NEXT PAGE.

C (THE MAN :) THE MAN NAME/ED ANDREW SAID (: ) "DANIEL, LOOK AT MY (T\*) DRUM

SET".

C "YOU RUIN/ED IT".

C "I CAN/'T PLAY IN[EW:ON] MY DRUM/S ANYMORE.

C "THANKS ALOT, DANIEL".

C HE WALK/ED HOME.

C THE FROG LEAP/ED ON TO THE SALAD WHERE THE MAN CARRY/ED IT.

: 00:06

- 5:00

E NEXT PAGE.

C THE MAN SERVE/3S TO (THE L\*) THE LADY SOME SALAD.

C THERE/'S A FROG IN IT.

C THE FROG WAS IN THE SALAD.

C AND THE LADY ATE THE SALAD.

C (AND THERE W\* AND) AND THERE/'S A FROG IN IT.

: 00:05

E NEXT PAGE.

C AND ON THIS PAGE %OOH.

C THE LADY HOLLER/ED.

C THE SALAD, THE CUP, AND THE FORK WENT EVERYWHERE.

C SHE SAID "HELP, I/'M EAT/ING BY A FROG".

- 6:00

C HE LEAP/\*ED INTO A CUP.

C AND SERVE/ED IT TO ANOTHER LADY.

: 00:09

E NEXT PAGE.

C "OH DEAR"!

C "OH".

C "I/'M TERRIFIED".

C "YOU TRAITOR" SAID THE WOMAN.

C THE FROG KISS/ED THE FATHER.

C THE FATHER WENT {C MADE FACIAL EXPRESSION}.

C "FROG WAS KISS/ING ME".

C "YOU/'RE A FUNNY FROGGY".

- 7:00

C HE PET/ED HIM.

E NEXT PAGE.

C THE MAN GOT THE FROG.

C AND (:) GOT HIM.

; 00:06

C THE FATHER AND THE LADY WAS[EW:WERE] SCARED.

C THEY DID/N'T KNOW WHAT TO DO.

C THEY WENT HOME (T\*) TO THEIR HOUSE AND FAINT/ED.

E NEXT PAGE.

: 00:07

- 8:02

C THE MAN CARRY/ED THE FROG WITH[EW:BY] HIS FEET TO THE FIREEXIT.

C THE FROG SAID "LET ME GO".

C "LET ME GO".

C "I/M SORRY".

C "LET ME GO".

C STEVE WAS POINT/ING TO THE FROG.

C AND SAID "THAT/S MY FROG".

C "HE IS MY PET".

C "GIVE ME".

C "GIVE ME".

= C LAUGHED

C DID I MAKE YOU LAUGH {C IS TALKING TO E}?

E NEXT PAGE.

C "THAT/S MY PET" CRY/ED STEVE.

- 9:00

C THE MAN SAID "YOUR PET".

C "I/M SORRY, BUT YOU CAN/T ALLOW PET/S IN A RESTAURANT".

C THE MAN WAS YELL/ING (: ) TO STEVE.

C HE HOLD/\*3S THE FROG WITH HIS BARE HAND/S.

: 00:06

E NEXT PAGE.

: 00:07

C (THE) IT WAS GET/ING DARK.

C THEY WANNA GO HOME NOW.

C (M\* HIS MOTHER) HIS FATHER AND MOTHER WERE SAD BECAUSE STEVE DID NOT LET THE

FROG TO THE RESTAURANT [EU].

- 10:05

C XX.

C STEVE SAID "OK, I WON/T".

: 00:05

E NEXT PAGE.

C HIS FATHER SAID "GO TO YOUR ROOM RIGHT NOW, YOUNG MAN"!

C "THINK ABOUT (: ) WHAT YOU/'RE DO/ING".

C "YOU ARE GROUNDED, MISTER".

C (SO :) SO STEVE START/ED INTO HIS ROOM.

C AND SLAM/ED THE DOOR INSIDE.

C "I/LL NEVER SEE YOU AGAIN, FATHER".

- 11:00

C (SO) SO HE HAD CRY/ED AND CRY/ED THROUGHOUT THE NIGHT.

: 00:05

E LAST PAGE.

C (STEVE AND THE) STEVE AND HIS FROG WERE HAPPY.

C AND THEY/'RE CELEBRATE/ING.

C AND STEVE WAS AMAZED THAT HE WOULD NEVER TAKE HIS PET FROG TO A RESTAURANT.

C AT LEAST EVERYTHING WENT OK.

C SO DID THE DAY.

C THE END.

- 11:53
